# Supplementary material for: Confined oriented growth of FeSe2 on a porous graphene film as a binder-free anode for high-rate lithium-ion batteries
Source: Royal Society of Chemistry journal article supplement (doi:10.1039/d3ma00269a), 2023-01-01
Supplement: d3ma00269a1.pdf [file d3ma00269a1.pdf]

## Supplementary Information

### Confined oriented growth of FeSe<sub>2</sub> on porous graphene film as binder-free anodes for high-rate lithium-ion batteries

Xiaoting Zhang,<sup>a</sup> Jiaxiu Diao,<sup>a</sup> Jinghao Qiao,<sup>a</sup> Yuhui Wen,<sup>a</sup> Hongkun Zhang<sup>\*b, c</sup> and Rui Wang<sup>\*a</sup>

<sup>a</sup>Beijing Key Laboratory of Clothing Materials R & D and Assessment, Beijing Engineering Research Center of Textile Nanofiber, School of Materials Design & Engineering, Beijing Institute of Fashion Technology, Beijing 100029, China.

<sup>b</sup>GRINM Group Corporation Limited, Beijing 100088, China.

<sup>c</sup>China United Test & Certification Co., Ltd, Beijing 101407, China

\* Corresponding author. E-mail: clywangrui@bift.edu.cn, zhk@cutc.net

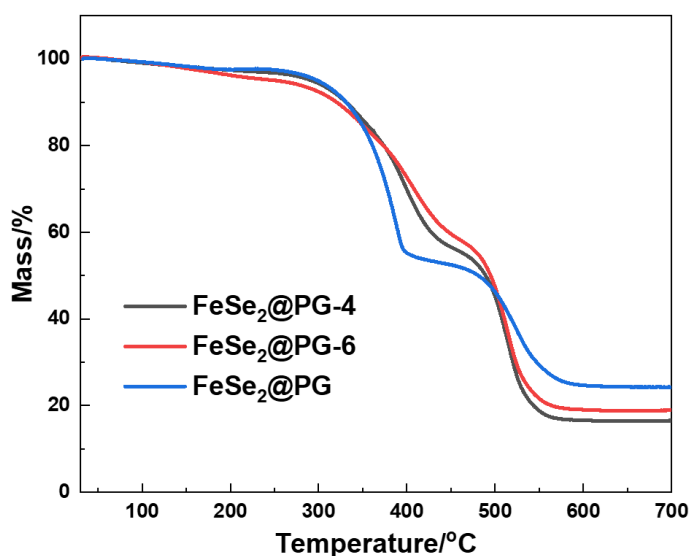

**Fig. S1** TG curves of FeSe<sub>2</sub>@PG-4, FeSe<sub>2</sub>@PG-6, and FeSe<sub>2</sub>@PG.

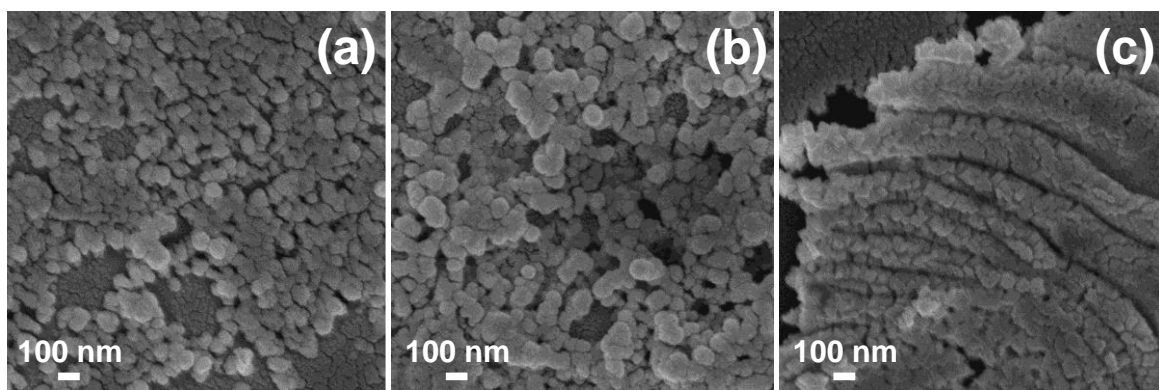

**Fig. S2** SEM images of (a) FeSe<sub>2</sub>@PG-4, (b) FeSe<sub>2</sub>@PG-6, and (c) FeSe<sub>2</sub>@PG electrodes after cycling.

**Table S1** The area of C=C/C-C, C-Se, C-O, and C=O in C1s spectra of FeSe<sub>2</sub>@PG-4, FeSe<sub>2</sub>@PG-6, and FeSe<sub>2</sub>@PG.

|                                | FeSe <sub>2</sub> @PG-4 | FeSe <sub>2</sub> @PG-6 | FeSe <sub>2</sub> @PG |
|--------------------------------|-------------------------|-------------------------|-----------------------|
| Area of C=C/C-C in C1s spectra | 73724.09                | 82562.79                | 58849.23              |
| Area of C-Se in C1s spectra    | 16359.72                | 25150.84                | 23045.96              |
| Area of C-O in C1s spectra     | 11312.03                | 7604.015                | 5164.088              |
| Area of C=O in C1s spectra     | 7785.473                | 8036.601                | 4746.244              |

**Table S2** The area of Se-Se, Se-Fe-Se, Fe-Se, Se-O, C-Se-Fe, and C-Se-C in Se 3d spectra of FeSe<sub>2</sub>@PG-4, FeSe<sub>2</sub>@PG-6, and FeSe<sub>2</sub>@PG.

|                                   | FeSe <sub>2</sub> @PG-4 | FeSe <sub>2</sub> @PG-6 | FeSe <sub>2</sub> @PG |
|-----------------------------------|-------------------------|-------------------------|-----------------------|
| Area of Se-Se in Se 3d spectra    | 4816.495                | 4834.59                 | 3890.376              |
| Area of Se-Fe-Se in Se 3d spectra | 2931.876                | 3452.356                | 3007.696              |
| Area of Fe-Se in Se 3d spectra    | 1192.594                | 1767.92                 | 2057.808              |
| Area of Se-O in Se 3d spectra     | 4402.071                | 4799.897                | 4903.049              |
| Area of C-Se-Fe in Se 3d spectra  | 1167.308                | 1998.7                  | 2085.992              |
| Area of C-Se-C in Se 3d spectra   | 329.547                 | 503.768                 | 297.381               |

**Table S3** The area ratio of C=C/C–C, C–Se, C–O, and C=O in C1s spectra of FeSe<sub>2</sub>@PG-4, FeSe<sub>2</sub>@PG-6, and FeSe<sub>2</sub>@PG.

|                                | FeSe <sub>2</sub> @PG-4 | FeSe <sub>2</sub> @PG-6 | FeSe <sub>2</sub> @PG |
|--------------------------------|-------------------------|-------------------------|-----------------------|
| Area of C=C/C–C in C1s spectra | 67.5 %                  | 66.9 %                  | 64.1 %                |
| Area of C–Se in C1s spectra    | 15.0 %                  | 20.4 %                  | 25.1 %                |
| Area of C–O in C1s spectra     | 10.4 %                  | 6.2 %                   | 5.6 %                 |
| Area of C=O in C1s spectra     | 7.1 %                   | 6.5 %                   | 5.2 %                 |

**Table S4** The area ratio of Se–Se, Se–Fe–Se, Fe–Se, Se–O, C–Se–Fe, and C–Se–C in Se 3d spectra of FeSe<sub>2</sub>@PG-4, FeSe<sub>2</sub>@PG-6, and FeSe<sub>2</sub>@PG.

|                                   | FeSe <sub>2</sub> @PG-4 | FeSe <sub>2</sub> @PG-6 | FeSe <sub>2</sub> @PG |
|-----------------------------------|-------------------------|-------------------------|-----------------------|
| Area of Se–Se in Se 3d spectra    | 32.5 %                  | 27.8 %                  | 24.0 %                |
| Area of Se–Fe–Se in Se 3d spectra | 19.8 %                  | 19.9 %                  | 18.5 %                |
| Area of Fe–Se in Se 3d spectra    | 8.0 %                   | 10.2 %                  | 12.7 %                |
| Area of Se–O in Se 3d spectra     | 29.7 %                  | 27.7 %                  | 30.2 %                |
| Area of C–Se–Fe in Se 3d spectra  | 7.8 %                   | 11.5 %                  | 12.8 %                |
| Area of C–Se–C in Se 3d spectra   | 2.2 %                   | 2.9 %                   | 1.8 %                 |

**Table S5** The electrolyte resistance, SEI film resistance, and charge-transfer resistance of FeSe<sub>2</sub>@PG-4, FeSe<sub>2</sub>@PG-6, and FeSe<sub>2</sub>@PG.

|                                | FeSe <sub>2</sub> @PG-4 | FeSe <sub>2</sub> @PG-6 | FeSe <sub>2</sub> @PG |
|--------------------------------|-------------------------|-------------------------|-----------------------|
| The electrolyte resistance     | 5.601                   | 3.825                   | 3.374                 |
| The SEI film resistance        | 9.241                   | 9.209                   | 6.866                 |
| The charge-transfer resistance | 42.1                    | 39.17                   | 29.26                 |
